# Supplementary material
Source: Springer Nature journal article supplement (https://www.springermedizin.de/resource/supplementary/12985_2008_471_MOESM2_ESM.pdf/9607824)

Kvp1

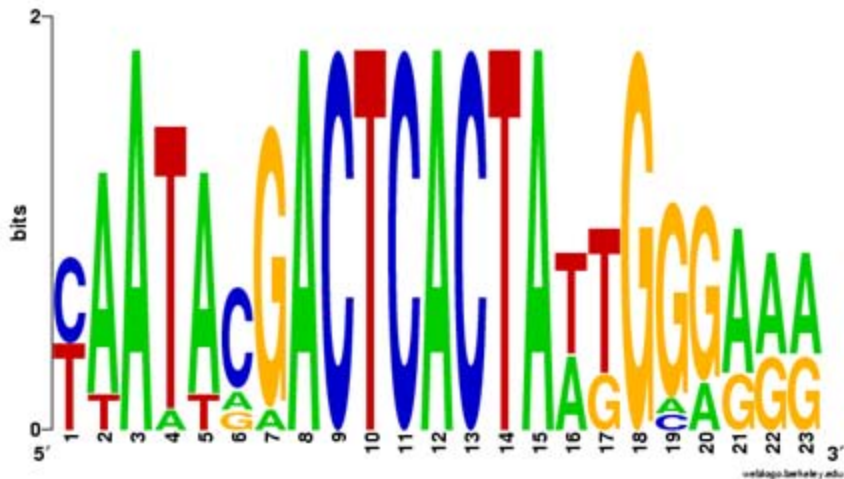

T3

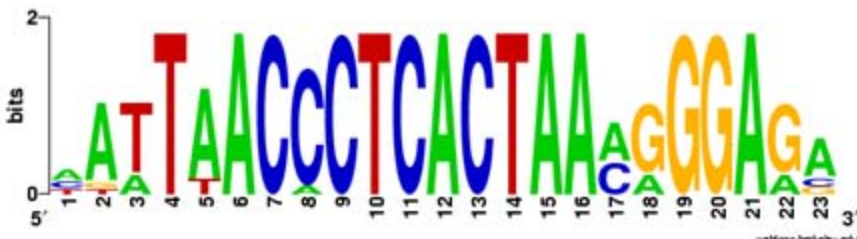

$\phi$ YeO3-12

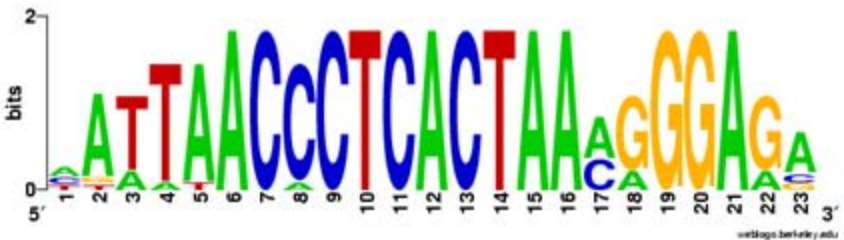

Berlin

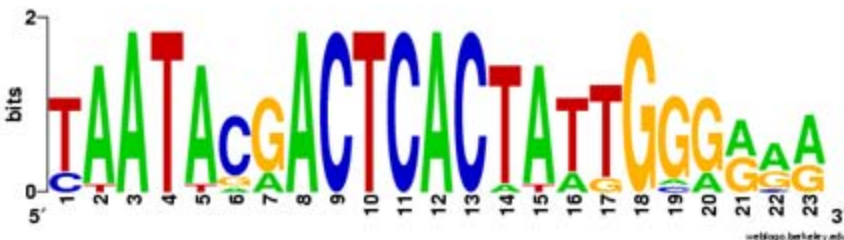

Supplement: MOESM2 [file 9607824]
